# Supplementary material for: Endocarditis in Liver Transplant Recipients: A Systematic Review
Source: MDPI journal article supplement (doi:10.3390/jcm10122660), 2021-06-16
Supplement: s1 [file s1]

**Supplementary Table 1.** Included studies' characteristics

| Study, year published  | Number of patients | Age (years) | Gender | Site of infection, n (%) | Microbiology of infection, n (%)     | Treatment administered | Infection Outcomes, n (%)                                                                               |
|------------------------|--------------------|-------------|--------|--------------------------|--------------------------------------|------------------------|---------------------------------------------------------------------------------------------------------|
| Woods et al, 1989 [11] | 1                  | 19          | Male   | TrV 1 (100)              | <i>Aspergillus flavus</i> 1 (100)    | Amphotericin B 1 (100) | Clinical cure <sup>a</sup><br>0 (0)<br>Overall<br>mortality 1 (100)<br>IE-specific<br>mortality 1 (100) |
| Estol et al, 1991 [12] | 1                  | 55          | Female | AoV 1 (100)              | <i>Staphylococcus aureus</i> 1 (100) | NR 1 (100)             | Clinical cure 0 (0)                                                                                     |

|                           |   |    |      |            |                                            |                           |                                                                                                          |
|---------------------------|---|----|------|------------|--------------------------------------------|---------------------------|----------------------------------------------------------------------------------------------------------|
|                           |   |    |      |            |                                            |                           | Overall<br>mortality 1<br>(100)<br>IE-specific<br>mortality 1<br>(100)                                   |
| Welty et al,<br>1992 [13] | 1 | 53 | Male | PV 1 (100) | <i>Pseudallescheria<br/>boydii</i> 1 (100) | No antifungals 1<br>(100) | Clinical cure 0<br>(0)<br><br>Overall<br>mortality 1<br>(100)<br><br>IE-specific<br>mortality 1<br>(100) |

|                           |   |      |        |                               |                                                |                                                                                                |                                                            |
|---------------------------|---|------|--------|-------------------------------|------------------------------------------------|------------------------------------------------------------------------------------------------|------------------------------------------------------------|
| David et al,<br>1992 [14] | 1 | 56   | Female | AoV 1 (100)                   | <i>Corynebacterium<br/>jeikeium</i> 1 (100)    | Cephalosporin 1<br>(100)<br><br>Vancomycin 1<br>(100)<br><br>Surgical<br>management 1<br>(100) | Clinical cure 1<br>(100)<br><br>Overall<br>mortality 0 (0) |
| Miga et al,<br>1996 [15]  | 1 | 1.33 | Male   | TrV 1 (100)                   | <i>Staphylococcus<br/>aureus</i> 1 (100)       | NR 1 (100)<br><br>Surgical<br>management 1<br>(100)                                            | Clinical cure 1<br>(100)<br><br>Overall<br>mortality 0 (0) |
| Heath et al,<br>1997 [16] | 1 | 45   | Male   | MV 1 (100)<br><br>TrV 1 (100) | <i>Phaeoacremonium<br/>parasiticum</i> 1 (100) | NR 1 (100)                                                                                     | Clinical cure 0<br>(0)<br><br>Overall                      |

|                              |    |                            |                    |                                                                    |                                                                                                                                                                                                 |                                                                                                                                                          |                                                                                                 |
|------------------------------|----|----------------------------|--------------------|--------------------------------------------------------------------|-------------------------------------------------------------------------------------------------------------------------------------------------------------------------------------------------|----------------------------------------------------------------------------------------------------------------------------------------------------------|-------------------------------------------------------------------------------------------------|
|                              |    |                            |                    |                                                                    |                                                                                                                                                                                                 |                                                                                                                                                          | mortality 1<br>(100)<br>IE-specific<br>mortality 1<br>(100)                                     |
| Paterson et al,<br>1997 [17] | 10 | Median 55<br>Range (39-61) | 9 male<br>1 female | AoV 5 (50)<br>Mural 3 (30)<br>MV 2 (20)<br>TrV 1 (10)<br>PV 1 (10) | <i>Aspergillus</i><br><i>fumigatus</i> 4 (40)<br><i>Staphylococcus</i><br><i>aureus</i> 4 (40)<br><i>Enterococcus</i><br><i>faecium</i> 1 (10)<br><i>Enterococcus</i><br><i>faecalis</i> 1 (10) | Vancomycin 5<br>(50)<br>Aminoglycoside 3<br>(30)<br>Amphotericin B 3<br>(30)<br>Rifampicin 2 (20)<br>Quinolone 1 (10)<br>No antimicrobial<br>used 1 (10) | Clinical cure 4<br>(40)<br>Overall<br>mortality 6<br>(60)<br>IE-specific<br>mortality 6<br>(60) |

|                        |   |    |        |             |                                      |                                                                         |                                                  |
|------------------------|---|----|--------|-------------|--------------------------------------|-------------------------------------------------------------------------|--------------------------------------------------|
|                        |   |    |        |             |                                      | Anti-staphylococcal penicillin 1 (10)<br>Surgical management 3 (30)     |                                                  |
| Hearn et al, 1999 [18] | 1 | 59 | Female | PV 1 (100)  | <i>Staphylococcus aureus</i> 1 (100) | Vancomycin 1 (100)<br>Rifampicin 1 (100)<br>Surgical management 1 (100) | Clinical cure 1 (100)<br>Overall mortality 0 (0) |
| Avery et al, 1999 [19] | 1 | 41 | Female | TrV 1 (100) | <i>Listeria monocytogenes</i> 1      | Aminopenicillin 1 (100)                                                 | Clinical cure 1 (100)                            |

|                             |   |    |      |                           |                                                                            |                                                        |                                                                                                          |
|-----------------------------|---|----|------|---------------------------|----------------------------------------------------------------------------|--------------------------------------------------------|----------------------------------------------------------------------------------------------------------|
|                             |   |    |      |                           | (100)                                                                      | Aminoglycoside 1<br>(100)                              | Overall<br>mortality 0 (0)                                                                               |
| Lorf et al,<br>1999 [20]    | 1 | 60 | Male | Mural 1 (100)             | <i>Aspergillus</i> spp. 1<br>(100)                                         | NR 1 (100)                                             | Clinical cure 0<br>(0)<br><br>Overall<br>mortality 1<br>(100)<br><br>IE-specific<br>mortality 1<br>(100) |
| Moreira et al,<br>2000 [21] | 1 | 64 | Male | AoV 1 (100)<br>MV 1 (100) | <i>Cutibacterium</i><br><i>(Propionibacterium)</i><br><i>acnes</i> 1 (100) | Vancomycin 1<br>(100)<br><br>Aminoglycoside 1<br>(100) | Clinical cure 1<br>(100)<br><br>Overall<br>mortality 0 (0)                                               |

|                                |   |    |      |               |                                                |                                               |                                                                                                          |
|--------------------------------|---|----|------|---------------|------------------------------------------------|-----------------------------------------------|----------------------------------------------------------------------------------------------------------|
|                                |   |    |      |               |                                                | Surgical<br>management 1<br>(100)             |                                                                                                          |
| Romagnuolo<br>et al, 2000 [22] | 1 | 37 | Male | Mural 1 (100) | <i>Aspergillus</i> spp. 1<br>(100)             | Amphotericin B 1<br>(100)                     | Clinical cure 1<br>(0)<br><br>Overall<br>mortality 1<br>(100)<br><br>IE-specific<br>mortality 1<br>(100) |
| Gotsman et al,<br>2003 [23]    | 1 | 33 | Male | TrV 1 (100)   | <i>Staphylococcus</i><br><i>aureus</i> 1 (100) | Vancomycin 1<br>(100)<br><br>Aminoglycoside 1 | Clinical cure 1<br>(100)<br><br>Overall                                                                  |

|                             |   |                            |                    |                            |                                               |                                                                     |                                                                                                  |
|-----------------------------|---|----------------------------|--------------------|----------------------------|-----------------------------------------------|---------------------------------------------------------------------|--------------------------------------------------------------------------------------------------|
|                             |   |                            |                    |                            |                                               | (100)<br>Surgical<br>management 1<br>(100)                          | mortality 0 (0)                                                                                  |
| Haddad et al,<br>2004 [24]  | 1 | 48                         | Female             | MV 1 (100)                 | <i>Staphylococcus aureus</i> 1 (100)          | Anti-<br>staphylococcal<br>penicillin 1 (100)<br>Rifampicin 1 (100) | Clinical cure 0<br>(0)<br>Overall<br>mortality 1<br>(100)<br>IE-specific<br>mortality 1<br>(100) |
| Ruttman et al,<br>2005 [25] | 7 | Median 53<br>Range (40-60) | 6 male<br>1 female | AoV 7 (100)<br>MV 4 (57.1) | Coagulase-negative<br><i>Staphylococcus</i> 3 | NR 7 (100)<br>Surgical                                              | Clinical cure 2<br>(28.6)                                                                        |



|                          |   |    |        |                           |                                                                                                                                                               |                                                                      |                                                              |
|--------------------------|---|----|--------|---------------------------|---------------------------------------------------------------------------------------------------------------------------------------------------------------|----------------------------------------------------------------------|--------------------------------------------------------------|
|                          |   |    |        |                           | (42.9)<br><i>Staphylococcus aureus</i> 2 (28.6)<br><i>Aspergillus</i> spp. 2 (28.6)<br><i>Enterococcus</i> spp. 2 (28.6)<br><i>Enterobacter</i> spp. 1 (14.3) | management 2 (28.6)                                                  | Overall mortality 5 (71.4)<br>IE-specific mortality 5 (71.4) |
| Salamon et al, 2006 [26] | 1 | 26 | Female | TrV 1 (100)<br>PV 1 (100) | <i>Candida albicans</i> 1 (100)                                                                                                                               | Fluconazole 1 (100)<br>5-fluocytosine 1 (100)<br>Caspofungin 1 (100) | Clinical cure 1 (100)<br>Overall mortality 0 (0)             |

|                             |   |    |      |               |                                                                                                  |                                                                     |                                                                                                  |
|-----------------------------|---|----|------|---------------|--------------------------------------------------------------------------------------------------|---------------------------------------------------------------------|--------------------------------------------------------------------------------------------------|
|                             |   |    |      |               |                                                                                                  | Surgical<br>management 1<br>(100)                                   |                                                                                                  |
| Goegele et al,<br>2007 [27] | 1 | 45 | Male | AoV 1 (100)   | Coagulase-negative<br><i>Staphylococcus</i> 1<br>(100)<br><i>Klebsiella terrigena</i><br>1 (100) | Carbapenem 1<br>(100)<br>Vancomycin 1<br>(100)<br>Linezolid 1 (100) | Clinical cure 0<br>(0)<br>Overall<br>mortality 1<br>(100)<br>IE-specific<br>mortality 1<br>(100) |
| Vianna et al,<br>2007 [28]  | 1 | 41 | Male | Mural 1 (100) | <i>Aspergillus</i><br><i>fumigatus</i> 1 (100)                                                   | Amphotericin B 1<br>(100)<br>Voriconazole 1                         | Clinical cure 1<br>(100)<br>Overall                                                              |

|                           |   |    |      |             |                                              |                                                                          |                                                                                                |
|---------------------------|---|----|------|-------------|----------------------------------------------|--------------------------------------------------------------------------|------------------------------------------------------------------------------------------------|
|                           |   |    |      |             |                                              | (100)<br>Caspofungin 1<br>(100)<br>Surgical<br>management 1<br>(100)     | mortality 0 (0)                                                                                |
| Kumar et al,<br>2007 [29] | 1 | 58 | Male | AoV 1 (100) | <i>Staphylococcus<br/>schleiferi</i> 1 (100) | Vancomycin 1<br>(100)<br>Aminoglycoside 1<br>(100)<br>Rifampicin 1 (100) | Clinical cure<br>NR (100)<br>Overall<br>mortality 1<br>(100)<br>IE-specific<br>mortality 0 (0) |
| Goegele et al,            | 1 | 53 | Male | AoV 1 (100) | Coagulase-negative                           | Teicoplanin 1                                                            | Clinical cure 0                                                                                |

|                            |   |      |      |                            |                                                                      |                                                |                                                                         |
|----------------------------|---|------|------|----------------------------|----------------------------------------------------------------------|------------------------------------------------|-------------------------------------------------------------------------|
| 2007 [30]                  |   |      |      |                            | <i>Staphylococcus</i> 1 (100)<br><i>Klebsiella terrigena</i> 1 (100) |                                                | (0)<br>Overall<br>mortality 1 (100)<br>IE-specific<br>mortality 1 (100) |
| Mourier et al, 2009 [31]   | 1 | 0.67 | Male | MV 1 (100)                 | <i>Aspergillus</i> spp. 1 (100)                                      | Amphotericin B 1 (100)<br>Voriconazole 1 (100) | Clinical cure 1 (100)<br>Overall<br>mortality 0 (0)                     |
| Vernadaki et al, 2009 [32] | 1 | 55   | Male | AoV 1 (100)<br>TrV 1 (100) | <i>Staphylococcus aureus</i> 1 (100)                                 | Daptomycin 1 (100)<br>Surgical                 | Clinical cure 1 (100)<br>Overall                                        |

|                             |   |                            |                    |                                         |                                                                                   |                                                                                                                                                                  |                                                                                                 |
|-----------------------------|---|----------------------------|--------------------|-----------------------------------------|-----------------------------------------------------------------------------------|------------------------------------------------------------------------------------------------------------------------------------------------------------------|-------------------------------------------------------------------------------------------------|
|                             |   |                            |                    |                                         |                                                                                   | management 1<br>(100)                                                                                                                                            | mortality 0 (0)                                                                                 |
| Forrest et al,<br>2011 [33] | 8 | Median 46<br>Range (26-74) | 3 male<br>5 female | MV 6 (75)<br>AoV 2 (25)<br>TrV 1 (12.5) | <i>Enterococcus<br/>faecalis</i> 6 (75)<br><i>Enterococcus<br/>faecium</i> 2 (25) | Aminoglycoside 7<br>(87.5)<br>Anti-<br>staphylococcal<br>penicillin 6 (75)<br>Daptomycin 2 (25)<br>Tigecycline 1<br>(12.5)<br>Surgical<br>Management 5<br>(62.5) | Clinical cure 6<br>(75)<br>Overall<br>mortality 2<br>(25)<br>IE-specific<br>mortality 2<br>(25) |
| Walter et al,               | 1 | 63                         | Male               | MV 1 (100)                              | <i>Staphylococcus</i>                                                             | NR 1 (100)                                                                                                                                                       | Clinical cure 0                                                                                 |

|                              |   |    |      |            |                                                                           |                                                                                         |                                                                          |
|------------------------------|---|----|------|------------|---------------------------------------------------------------------------|-----------------------------------------------------------------------------------------|--------------------------------------------------------------------------|
| 2011 [34]                    |   |    |      |            | <i>aureus</i> 1 (100)                                                     | Surgical<br>management 1<br>(100)                                                       | (0)<br>Overall<br>mortality 1<br>(100)<br>IE-specific<br>mortality 0 (0) |
| Castelli et al,<br>2011 [35] | 1 | 36 | Male | MV 1 (100) | <i>Corynebacterium</i><br>spp. 1 (100)<br><i>Nocardia</i> spp. 1<br>(100) | Vancomycin 1<br>(100)<br>Co-trimoxazole 1<br>(100)<br>Surgical<br>management 1<br>(100) | Clinical cure 1<br>(100)<br>Overall<br>mortality 0 (0)                   |
| Mrzljak et al,               | 1 | 63 | Male | MV 1 (100) | <i>Staphylococcus</i>                                                     | Anti-                                                                                   | Clinical cure 1                                                          |

|                            |   |    |        |            |                                         |                                                                                              |                                                     |
|----------------------------|---|----|--------|------------|-----------------------------------------|----------------------------------------------------------------------------------------------|-----------------------------------------------------|
| 2012 [36]                  |   |    |        |            | <i>lugdunensis</i> 1 (100)              | staphylococcal<br>penicillin 1 (100)<br>Vancomycin 1 (100)<br>Surgical<br>management 1 (100) | (100)<br>Overall<br>mortality 0 (0)                 |
| George et al,<br>2013 [37] | 1 | 51 | Male   | MV 1 (100) | <i>Escherichia coli</i> 1 (100)         | Carbapenem 1 (100)<br>Tigecycline 1 (100)                                                    | Clinical cure 1 (100)<br>Overall<br>mortality 0 (0) |
| Belvisi et al,<br>[38]     | 1 | 61 | Female | MV 1 (100) | <i>Streptococcus pneumoniae</i> 1 (100) | Linezolid 1 (100)<br>Cephalosporin 1 (100)                                                   | Clinical cure 1 (100)<br>Overall                    |

|                        |   |        |        |                         |                                       |                                                                                |                                                  |
|------------------------|---|--------|--------|-------------------------|---------------------------------------|--------------------------------------------------------------------------------|--------------------------------------------------|
|                        |   |        |        |                         |                                       |                                                                                | mortality 0 (0)                                  |
| Borde et al, 2013 [39] | 1 | 36     | Female | AoV 1 (100)             | <i>Streptococcus viridans</i> 1 (100) | Cephalosporin 1 (100)<br>Surgical management 1 (100)                           | Clinical cure 1 (100)<br>Overall mortality 0 (0) |
| Fernández-Hidalgo [40] | 2 | 56, 78 | 2 male | MV 1 (50)<br>AoV 1 (50) | <i>Enterococcus faecalis</i> 2 (100)  | Cephalosporin 2 (100)<br>Aminopenicillin 2 (100)<br>Surgical management 1 (50) | Clinical cure 2 (100)<br>Overall mortality 0 (0) |
| Dahya et al            | 1 | 62     | Male   | AoV 1 (100)             | <i>Peptostreptococcus</i>             | Vancomycin 1                                                                   | Clinical cure 1                                  |



|                           |   |    |      |             |                                               |                                                                        |                                                                                                  |
|---------------------------|---|----|------|-------------|-----------------------------------------------|------------------------------------------------------------------------|--------------------------------------------------------------------------------------------------|
| [41]                      |   |    |      |             | spp. 1 (100)                                  | (100)<br>Cephalosporin 1<br>(100)<br>Surgical<br>management 1<br>(100) | (100)<br>Overall<br>mortality 0 (0)                                                              |
| Lewis et al,<br>2016 [42] | 1 | 63 | Male | TrV 1 (100) | <i>Enterococcus</i><br><i>faecium</i> 1 (100) | NR 1 (100)                                                             | Clinical cure 0<br>(0)<br>Overall<br>mortality 1<br>(100)<br>IE-specific<br>mortality 1<br>(100) |

|                            |   |    |        |                                                  |                                      |                                                           |                                                                                        |
|----------------------------|---|----|--------|--------------------------------------------------|--------------------------------------|-----------------------------------------------------------|----------------------------------------------------------------------------------------|
| Blackwood et al, 2017 [43] | 1 | 4  | Female | NR 1 (100)                                       | <i>Staphylococcus aureus</i> 1 (100) | NR 1 (100)                                                | Clinical cure 1 (100)<br><br>Overall mortality 0 (0)                                   |
| Alsobayeg et al, 2018 [44] | 1 | 56 | Female | AoV 1 (100)<br><br>MV 1 (100)<br><br>TrV 1 (100) | <i>Aspergillus flavus</i> 1 (100)    | Amphotericin B 1 (100)<br><br>Surgical management 1 (100) | Clinical cure 0 (0)<br><br>Deaths overall 1 (100)<br><br>IE-specific mortality 1 (100) |
| Kim et al, 2018 [45]       | 1 | 61 | Male   | Mural 1 (100)                                    | <i>Aspergillus</i> spp. 1 (100)      | Voriconazole 1 (100)                                      | Clinical cure 0 (0)<br><br>Overall                                                     |

|                                |   |    |      |             |                                     |                                                                                                                                                                  |                                                             |
|--------------------------------|---|----|------|-------------|-------------------------------------|------------------------------------------------------------------------------------------------------------------------------------------------------------------|-------------------------------------------------------------|
|                                |   |    |      |             |                                     |                                                                                                                                                                  | mortality 1<br>(100)<br>IE-specific<br>mortality 1<br>(100) |
| Albuquerque<br>et al, 2019 [6] | 1 | 62 | Male | AoV 1 (100) | <i>Proteus mirabilis</i> 1<br>(100) | Aminopenicillin 1<br>(100)<br><br>Antistaphylococcal<br>penicillin 1 (100)<br><br>Antipseudomonal<br>penicillin 1 (100)<br><br>Surgical<br>management 1<br>(100) | Clinical cure 1<br>(100)<br><br>Overall<br>mortality 0 (0)  |

|                            |   |    |      |            |                                                                   |                                               |                                                  |
|----------------------------|---|----|------|------------|-------------------------------------------------------------------|-----------------------------------------------|--------------------------------------------------|
| Abbo et al, 2019 [46]      | 1 | 68 | Male | MV 1 (100) | <i>Enterococcus faecium</i> 1 (100)                               | Aminopenicillin 1 (100)<br>Daptomycin 1 (100) | Clinical cure 1 (100)<br>Overall mortality 0 (0) |
| Eid et al, 2020 [47]       | 1 | 65 | Male | MV 1 (100) | <i>Staphylococcus epidermidis</i> 1 (100)                         | NR 1 (100)<br>Surgical management 1 (100)     | Clinical cure 1 (100)<br>Overall mortality 0 (0) |
| Thavamani et al, 2020 [48] | 1 | 18 | Male | NR 1 (100) | <i>Klebsiella</i> spp. 1 (100)<br><i>Escherichia coli</i> 1 (100) | NR 1 (100)                                    | Clinical cure 1 (100)<br>Overall mortality 0 (0) |

<sup>a</sup> Defined as clinical resolution of the infection as a result of treatment.

AoV: aortic valve; IE: infective endocarditis; MV: mitral valve, NR: not reported; PV: pulmonary valve; TrV: tricuspid valve
