# Supplementary material for: Endocarditis in Liver Transplant Recipients: A Systematic Review
Source: MDPI journal article supplement (doi:10.3390/jcm10122660), 2021-06-16
Supplement: s1 [file s1]

**Supplementary Table 2.** Microbiology of Infective Endocarditis in liver transplant recipients. Values show cases among patients with available data.

| Characteristic                                   | Value                |
|--------------------------------------------------|----------------------|
| <b>Gram-positives, n (%)</b>                     | <b>43/62 (69.4%)</b> |
| <i>Enterococcus</i> , n (%)                      | 16/62 (25.8%)        |
| <i>Enterococcus faecalis</i> , n (%)             | 9/16 (56.3%)         |
| <i>Enterococcus faecium</i> , n (%)              | 5/16 (31.3%)         |
| <i>Staphylococcus aureus</i> , n (%)             | 14/62 (22.6%)        |
| Coagulase-negative <i>Staphylococcus</i> , n (%) | 8/62 (12.9%)         |
| <i>Streptococcus</i> spp., n (%)                 | 2/62 (3.2%)          |
| <b>Gram-negatives, n (%)</b>                     | <b>6/62 (9.7%)</b>   |
| <i>Klebsiella</i> spp., n (%)*                   | 3/62 (4.8%)          |
| <i>Escherichia coli</i> , n (%)*                 | 2/62 (3.2%)          |
| <i>Proteus mirabilis</i> , n (%)                 | 1/62 (1.6%)          |
| <i>Enterobacter</i> spp., n (%)                  | 1/62 (1.6%)          |
| <b>Fungi, n (%)</b>                              | <b>16/62 (25.8%)</b> |
| <i>Aspergillus</i> spp., n (%)                   | 13/62 (21%)          |
| <i>Candida albicans</i> , n (%)                  | 1/62 (1.6%)          |
| <i>Pseudallescheria boydii</i> , n (%)           | 1/62 (1.6%)          |
| <i>Phaeoacremonium parasiticum</i> , n (%)       | 1/62 (1.6%)          |
| <b>Polymicrobial, n (%)</b>                      | <b>9/62 (14.5%)</b>  |
| <b>Culture negative, n (%)</b>                   | <b>5/54 (9.3%)</b>   |

\* One patient had a polymicrobial infection by *Klebsiella* spp. and *E. coli*.
